# Supplementary material
Source: MDPI journal article supplement (https://www.mdpi.com/2673-4109/2/4/45)
Supplement: s1 [file s1]

Archive with 1 entries (1 files):
- civileng-1299005-supplementary.pdf
